# Supplementary material for: Prodromal Intestinal Events in Alzheimer’s Disease (AD): Colonic Dysmotility and Inflammation Are Associated with Enteric AD-Related Protein Deposition
Source: MDPI journal article supplement (doi:10.3390/ijms21103523), 2020-05-15
Supplement: s1 [file s1]

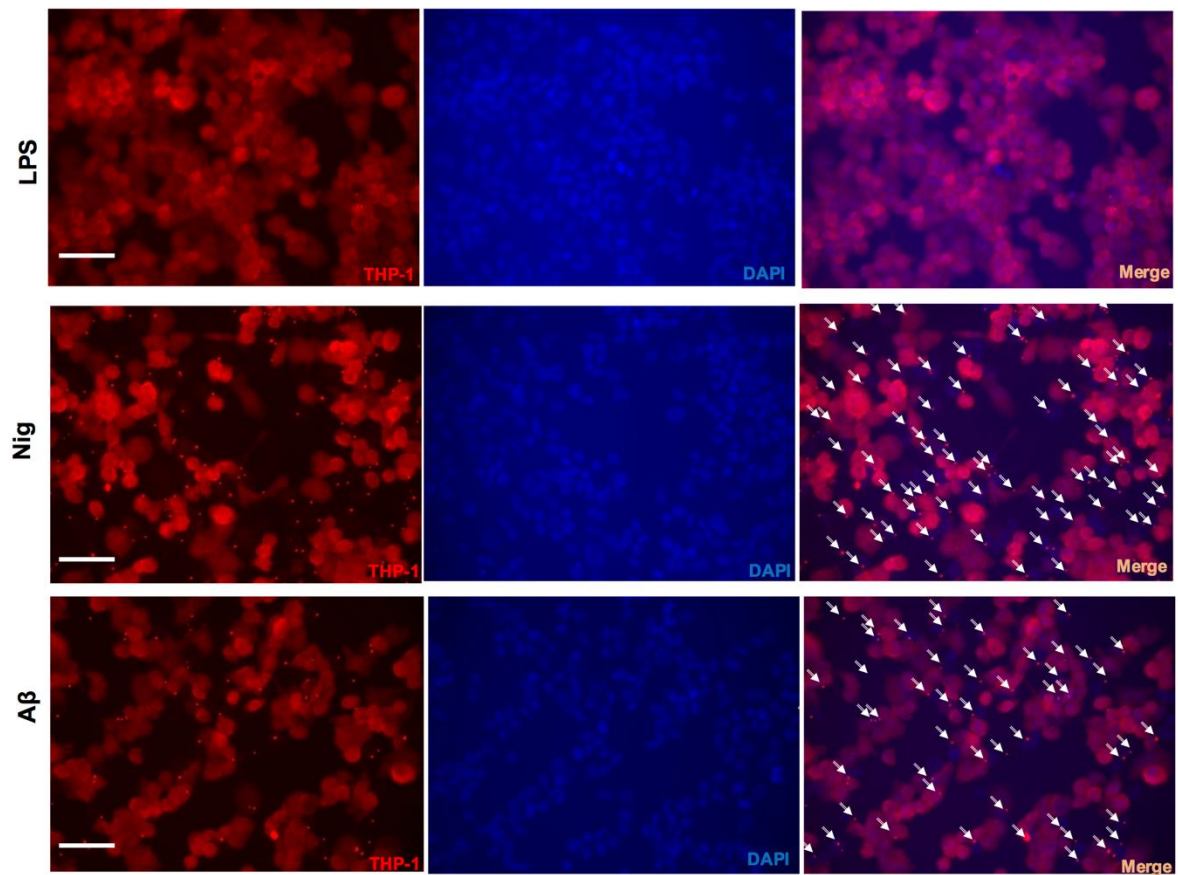

**Supplemental figure 1. Immunofluorescence of apoptosis-associated speck-like protein containing a caspase recruitment domain (ASC) ASC Speck Detection.** Immunofluorescence images of apoptosis-associated speck-like protein containing a caspase recruitment domain (ASC) expression in lipopolysaccharide (LPS)-primed (1g/mL, 4 h) human monocytic cell lines (THP-1) treated with nigericin (Nig, 10  $\mu$ M, 1 h) or amyloid  $\beta$  ( $A\beta$ , 10  $\mu$ M, 6 h). Scale bar = 50  $\mu$ m.
